# Supplementary material
Source: Research Square preprint supplement (doi:10.21203/rs.3.rs-9724069/v1)
Supplement: Supplementary file 1 [file 49247df2b89c2e8af15965d0.docx]

**Supplementary Information**

**Mitogenomic characterization and phylogenetic placement of the Mottled Wood-owl *Strix ocellata* with gene rearrangement patterns in Strigiformes**

Amitava Majumder1,†*, Angkasa Putra2,†, Anindya Naskar1,3, Agus Mohammad Hikam4, Dhriti Banerjee1, Hyun-WooKim4,5,6,7, Shantanu Kundu2,8,9,*

1Zoological Survey of India, ‘M’-Block, New Alipore, Kolkata – 700053, West Bengal, India.

2Interdisciplinary Program of Marine and Fisheries Sciences and Convergent Technology, Pukyong National University, Busan 48513, Republic of Korea.

3Department of Zoology, University of Calcutta, Kolkata – 700073, West Bengal, India.

4Department of Marine Biology, Pukyong National University, Busan 48513, Republic of Korea.

5Research Center for Marine Integrated Bionics Technology, Pukyong National University, Busan 48513, Republic of Korea.

6Marine Integrated Biomedical Technology Center, National Key Research Institutes in Universities, Pukyong National University, Busan 48513, Republic of Korea.

7Department of Biology, Faculty of Science and Technology, Airlangga University, Surabaya 60115, Indonesia.

8Ocean and Fisheries Development International Cooperation Institute, College of Fisheries Science, Pukyong National University, Busan 48513, Republic of Korea.

9International Graduate Program of Fisheries Science, Pukyong National University, Busan 48513, Republic of Korea.

†These authors contributed equally to this work.

*Correspondence: Amitava Majumder (amitavamajumder.eco@gmail.com) and Shantanu Kundu (shantanu1984@pknu.ac.kr or shantanu1984@gmail.com)


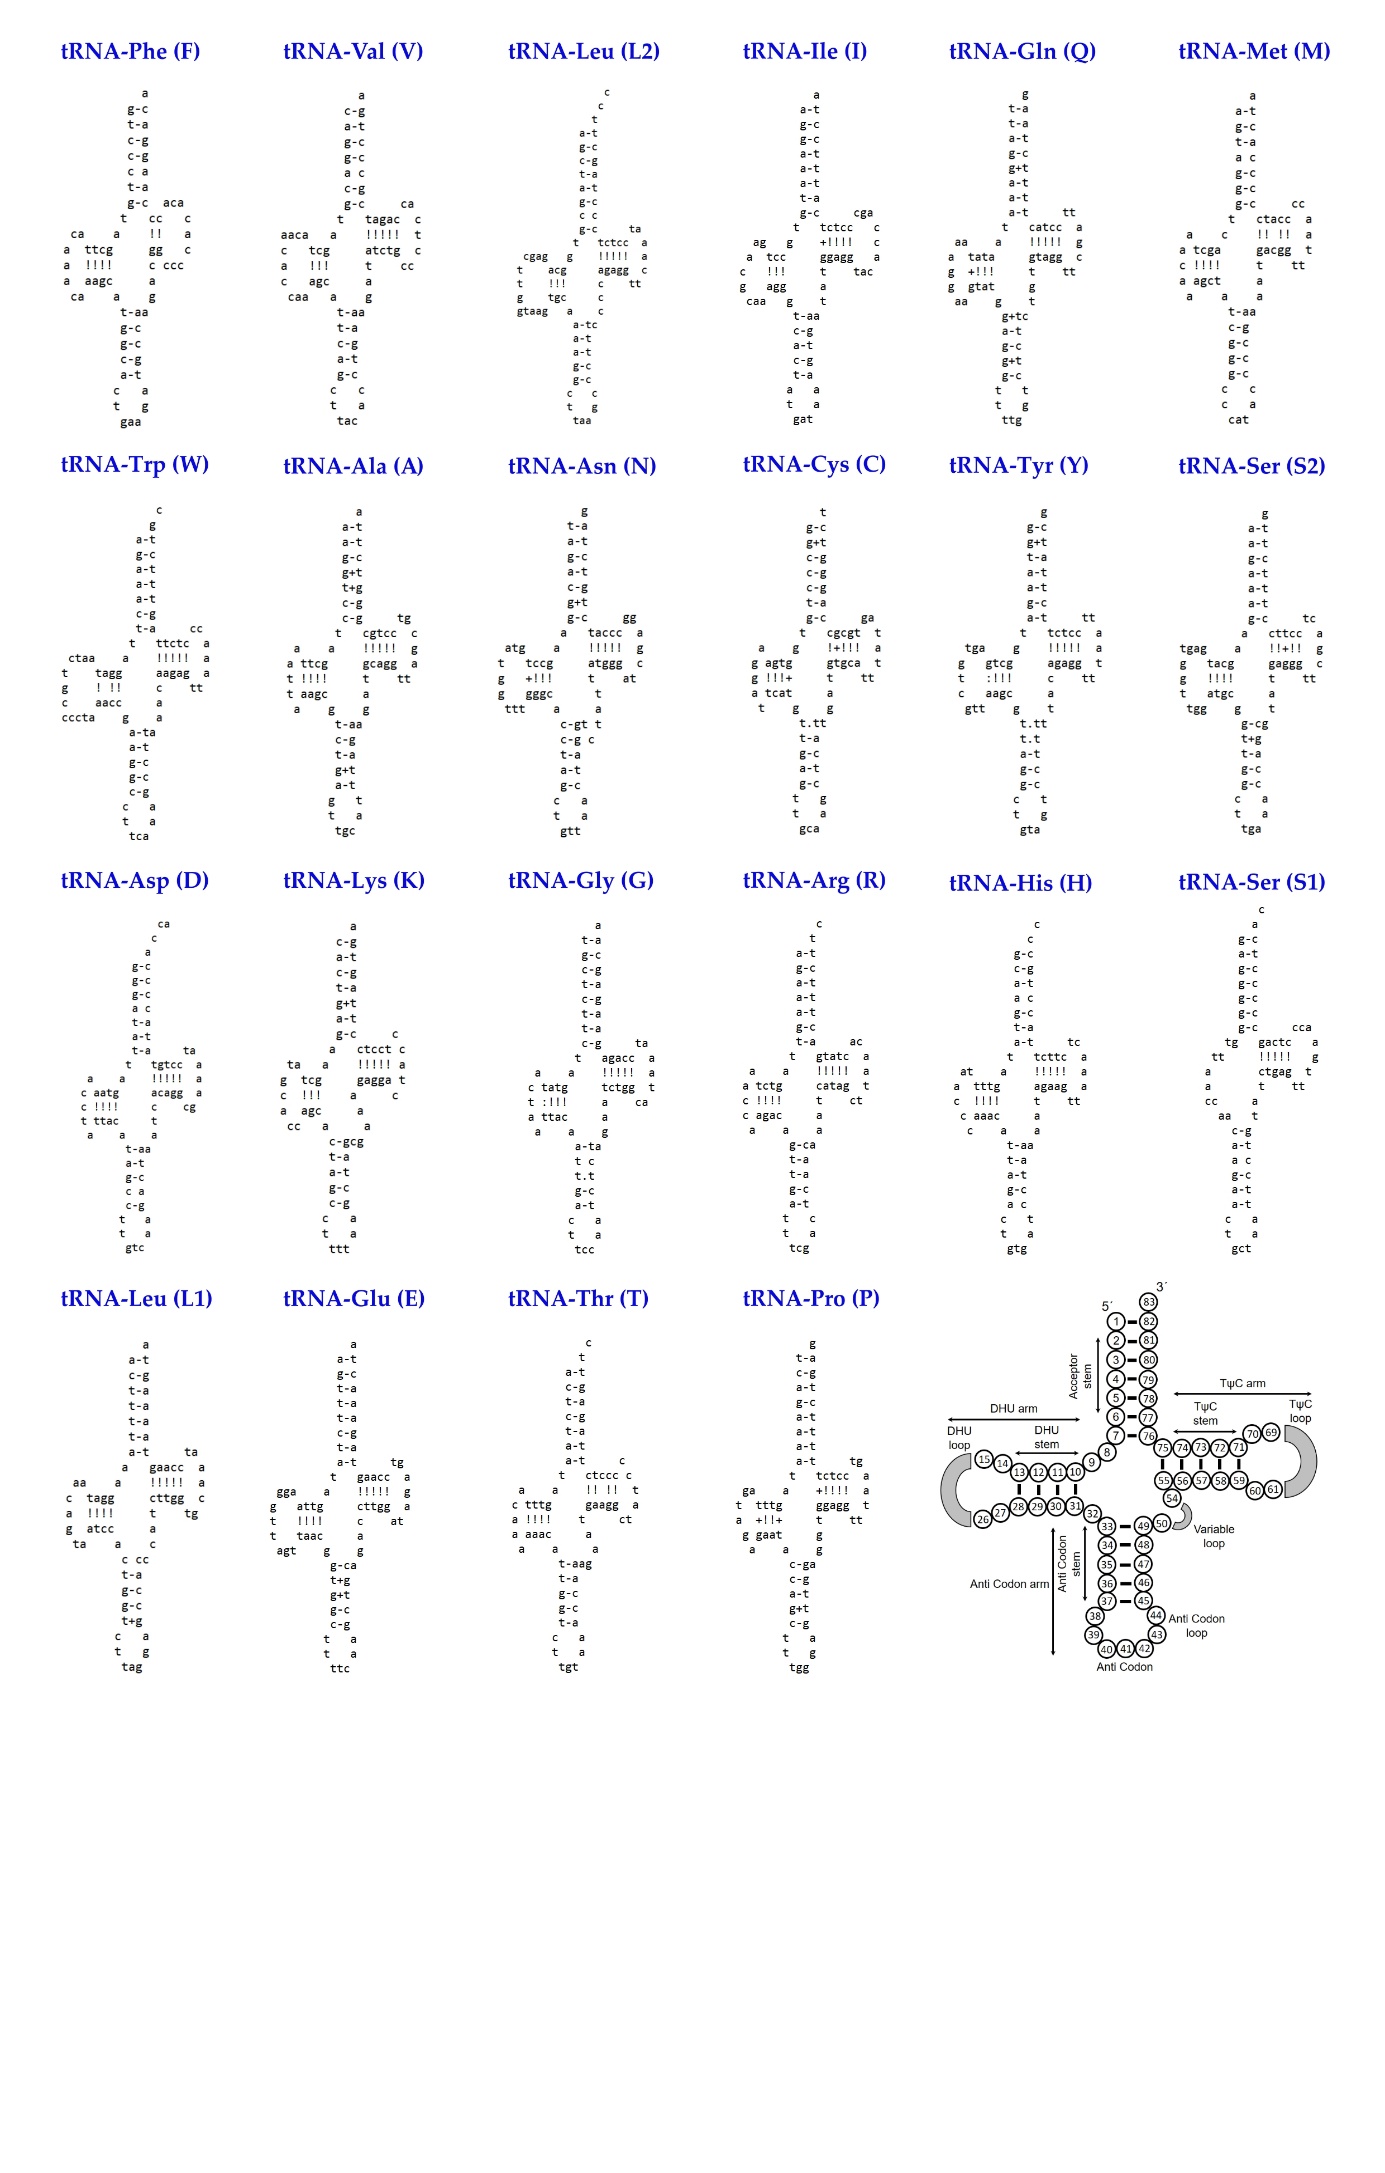


**Supplementary Fig. S1** The cloverleaf secondary structures of the 22 tRNAs identified in *S. ocellata*, illustrating structural variations. Each tRNA is labeled with the standard three-letter amino acid abbreviation and its corresponding IUPAC–IUB single-letter code.


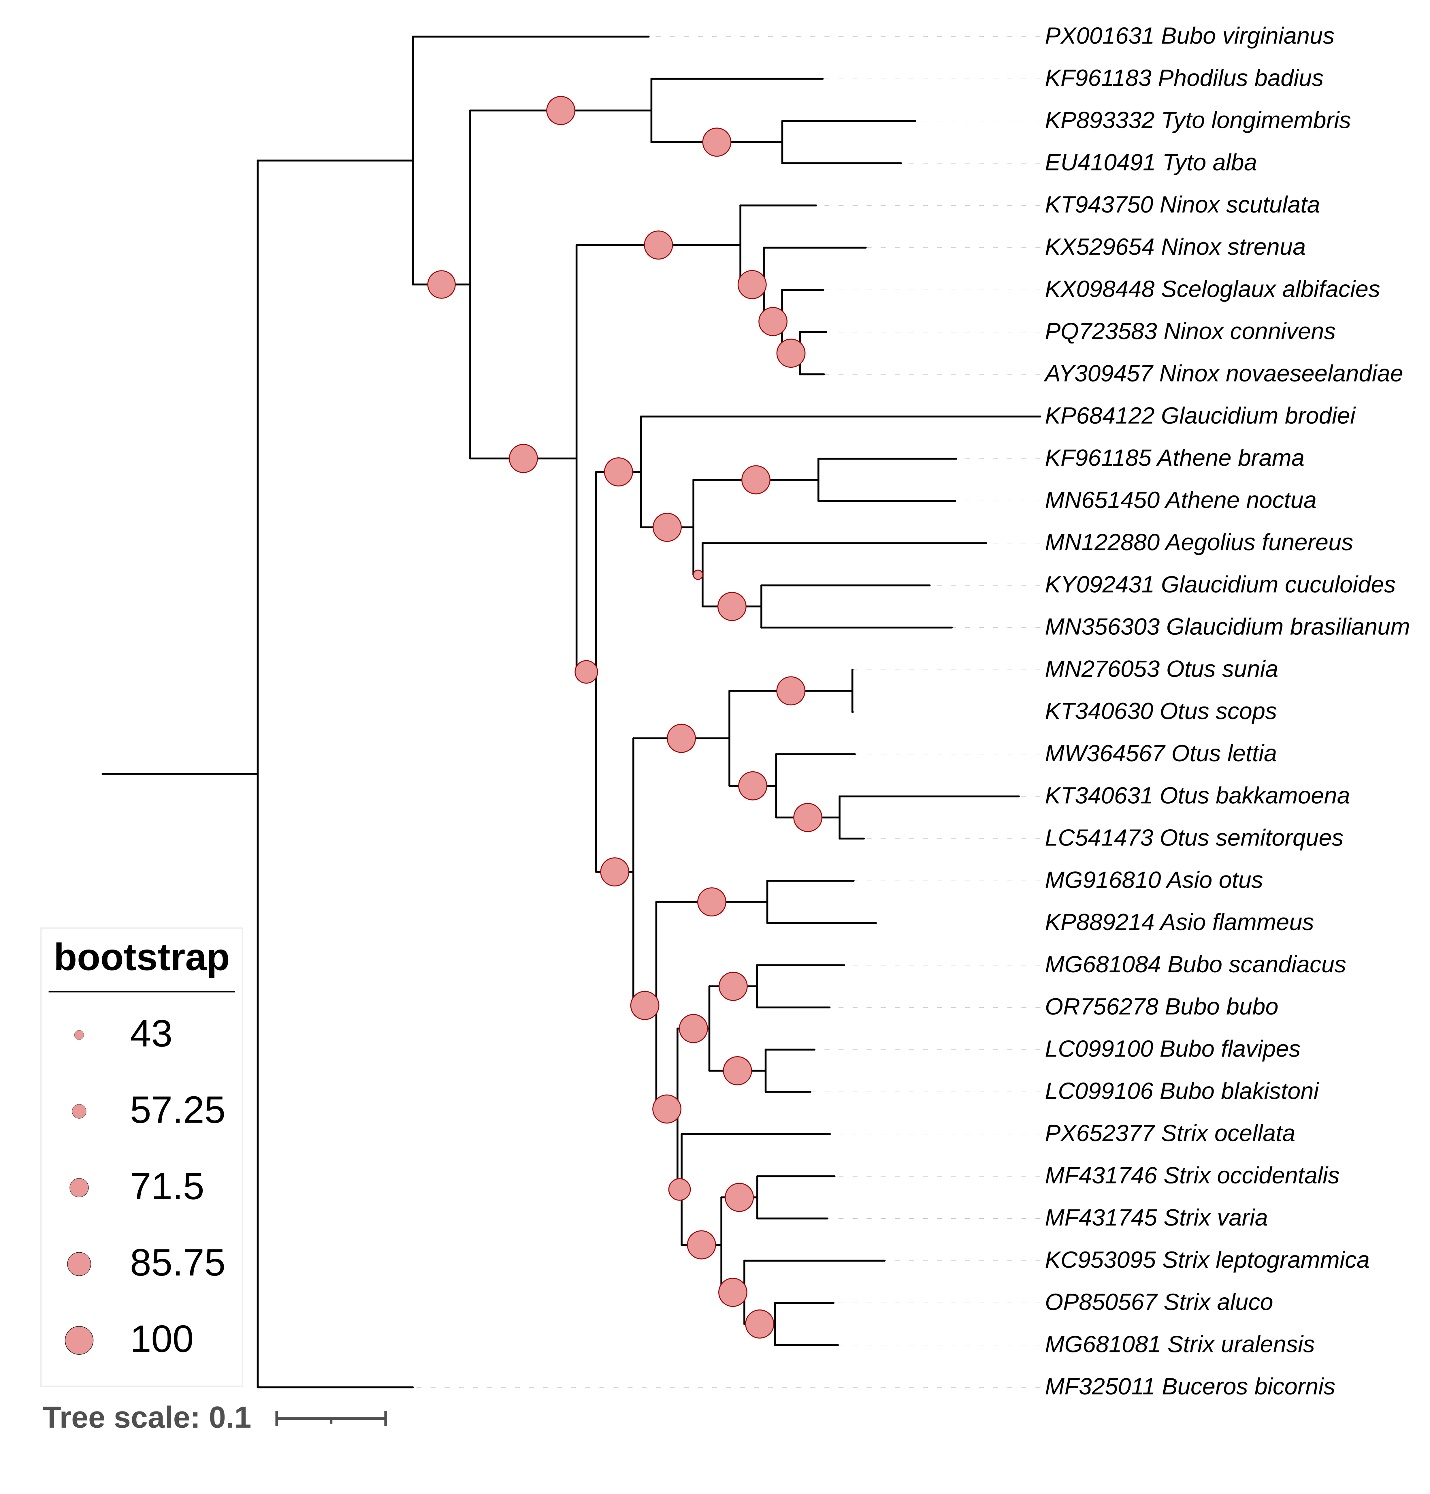


**Supplementary Fig. S2** The ML phylogenetic tree based on concatenated sequences of 13 PCGs, illustrating matrilineal evolutionary relationships among 33 species within the order Strigiformes. The topology supports the monophyletic relationships among six species of the genus *Strix* and clearly distinguishes *S. ocellata* from other owl species. The bootstrap support values are indicated by coral-colored circles at each node in the topology.


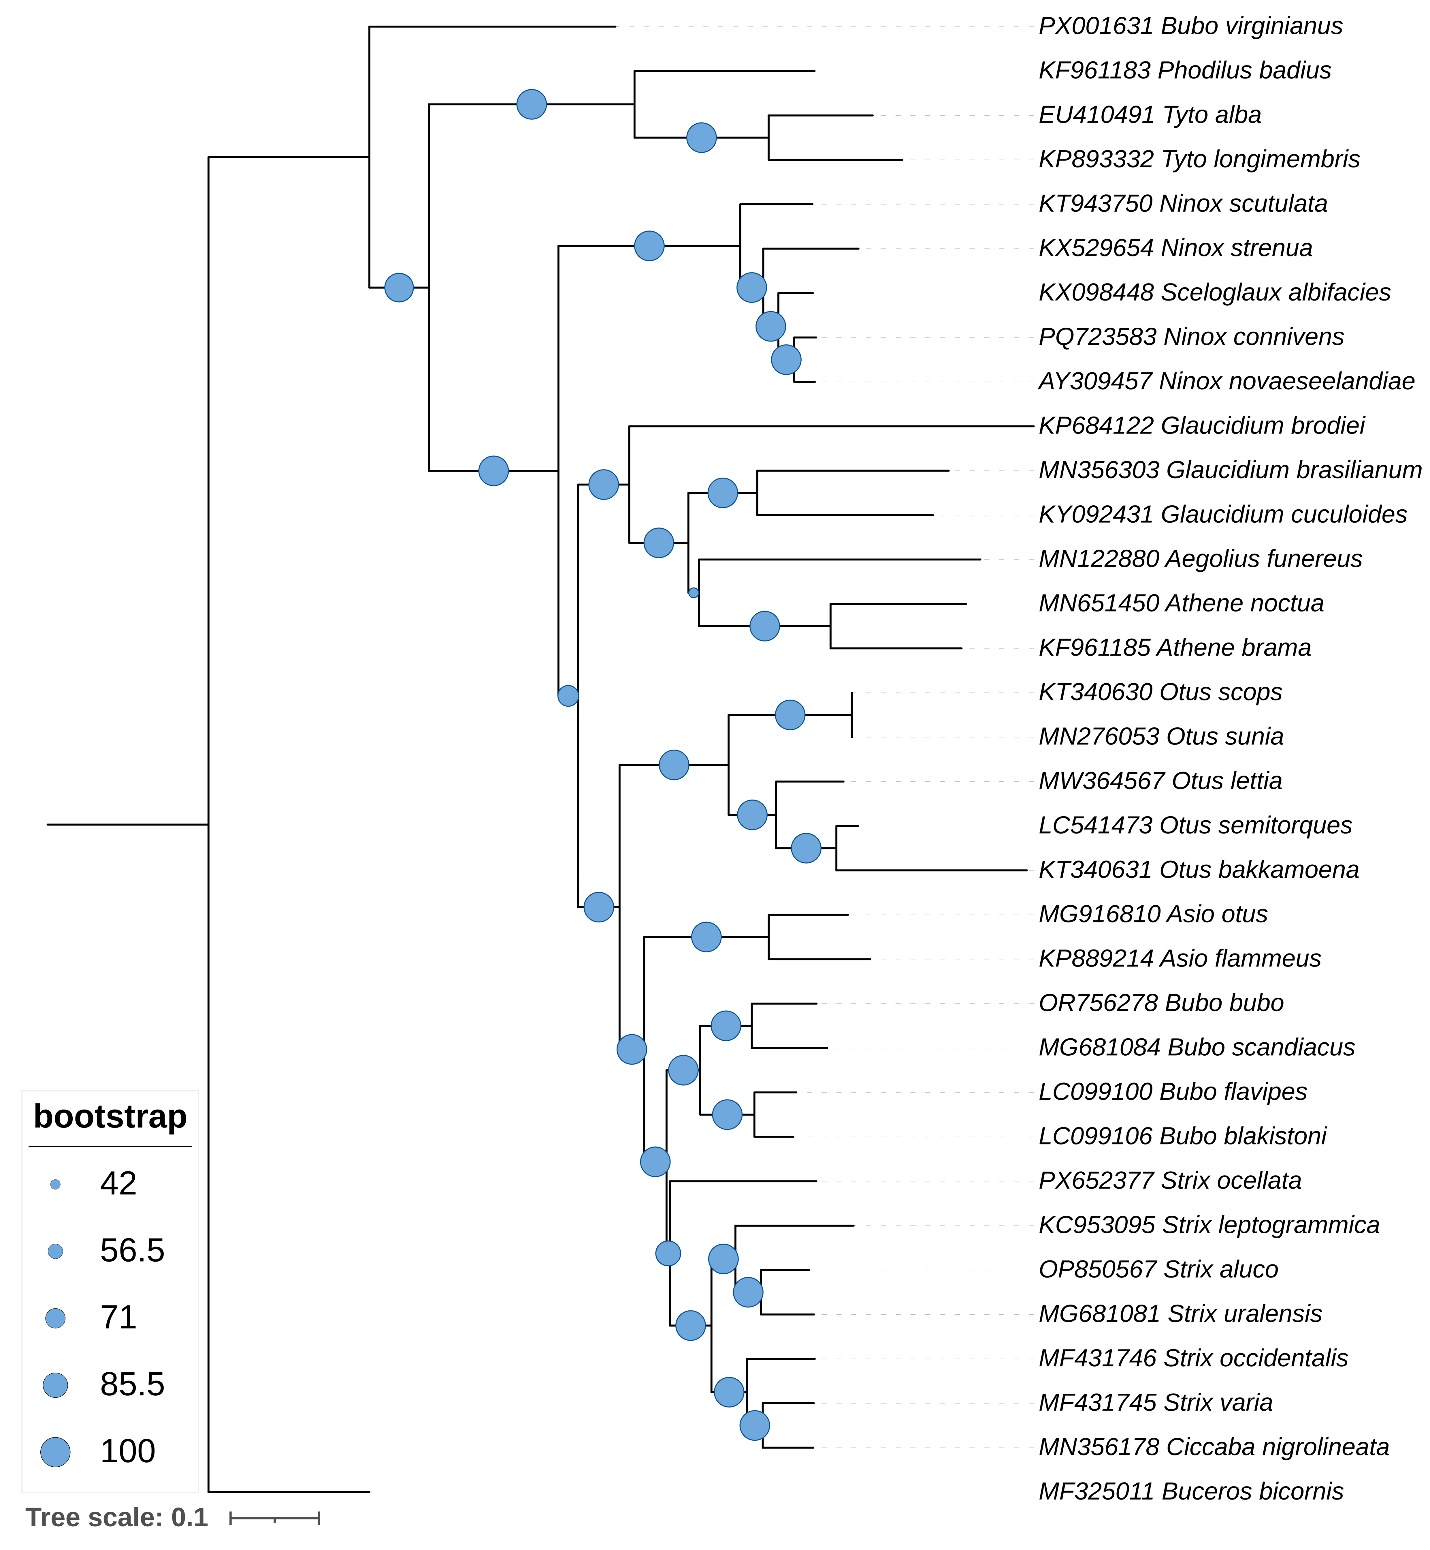


**Supplementary Fig. S3** The ML phylogenetic tree based on concatenated sequences of 12 PCGs, illustrating matrilineal evolutionary relationships among 34 species within the order Strigiformes. The topology supports the monophyletic relationships among six species of the genus *Strix* and clearly distinguishes *S. ocellata* from other owl species. The bootstrap support values are indicated by blue-colored circles at each node in the topology.


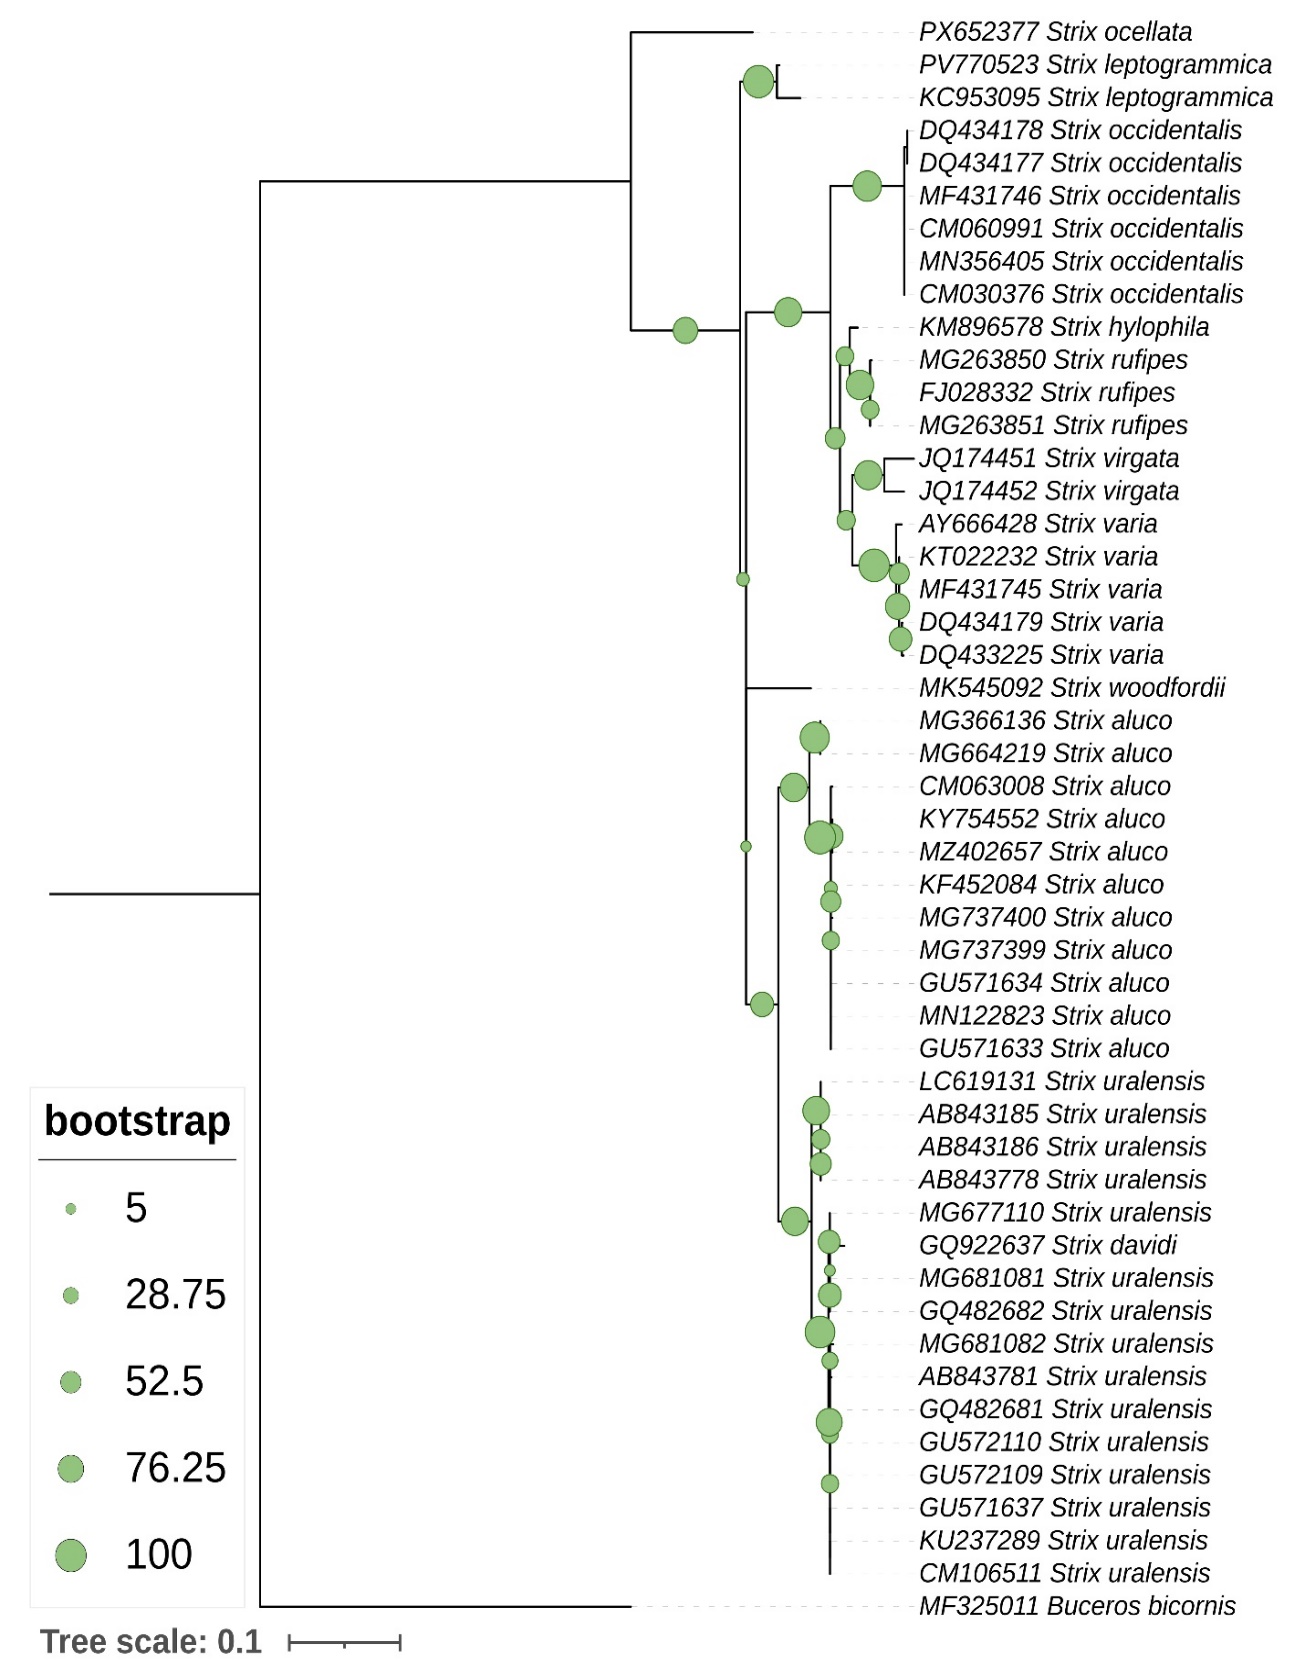


**Supplementary Fig. S4** The ML phylogenetic tree based on partial mtCOI sequences, illustrating matrilineal evolutionary relationships among 11 species within the genus *Strix*. The topology clearly distinguishes *S. ocellata* from other congeners and the bootstrap support values are indicated by green-colored circles at each node in the topology.


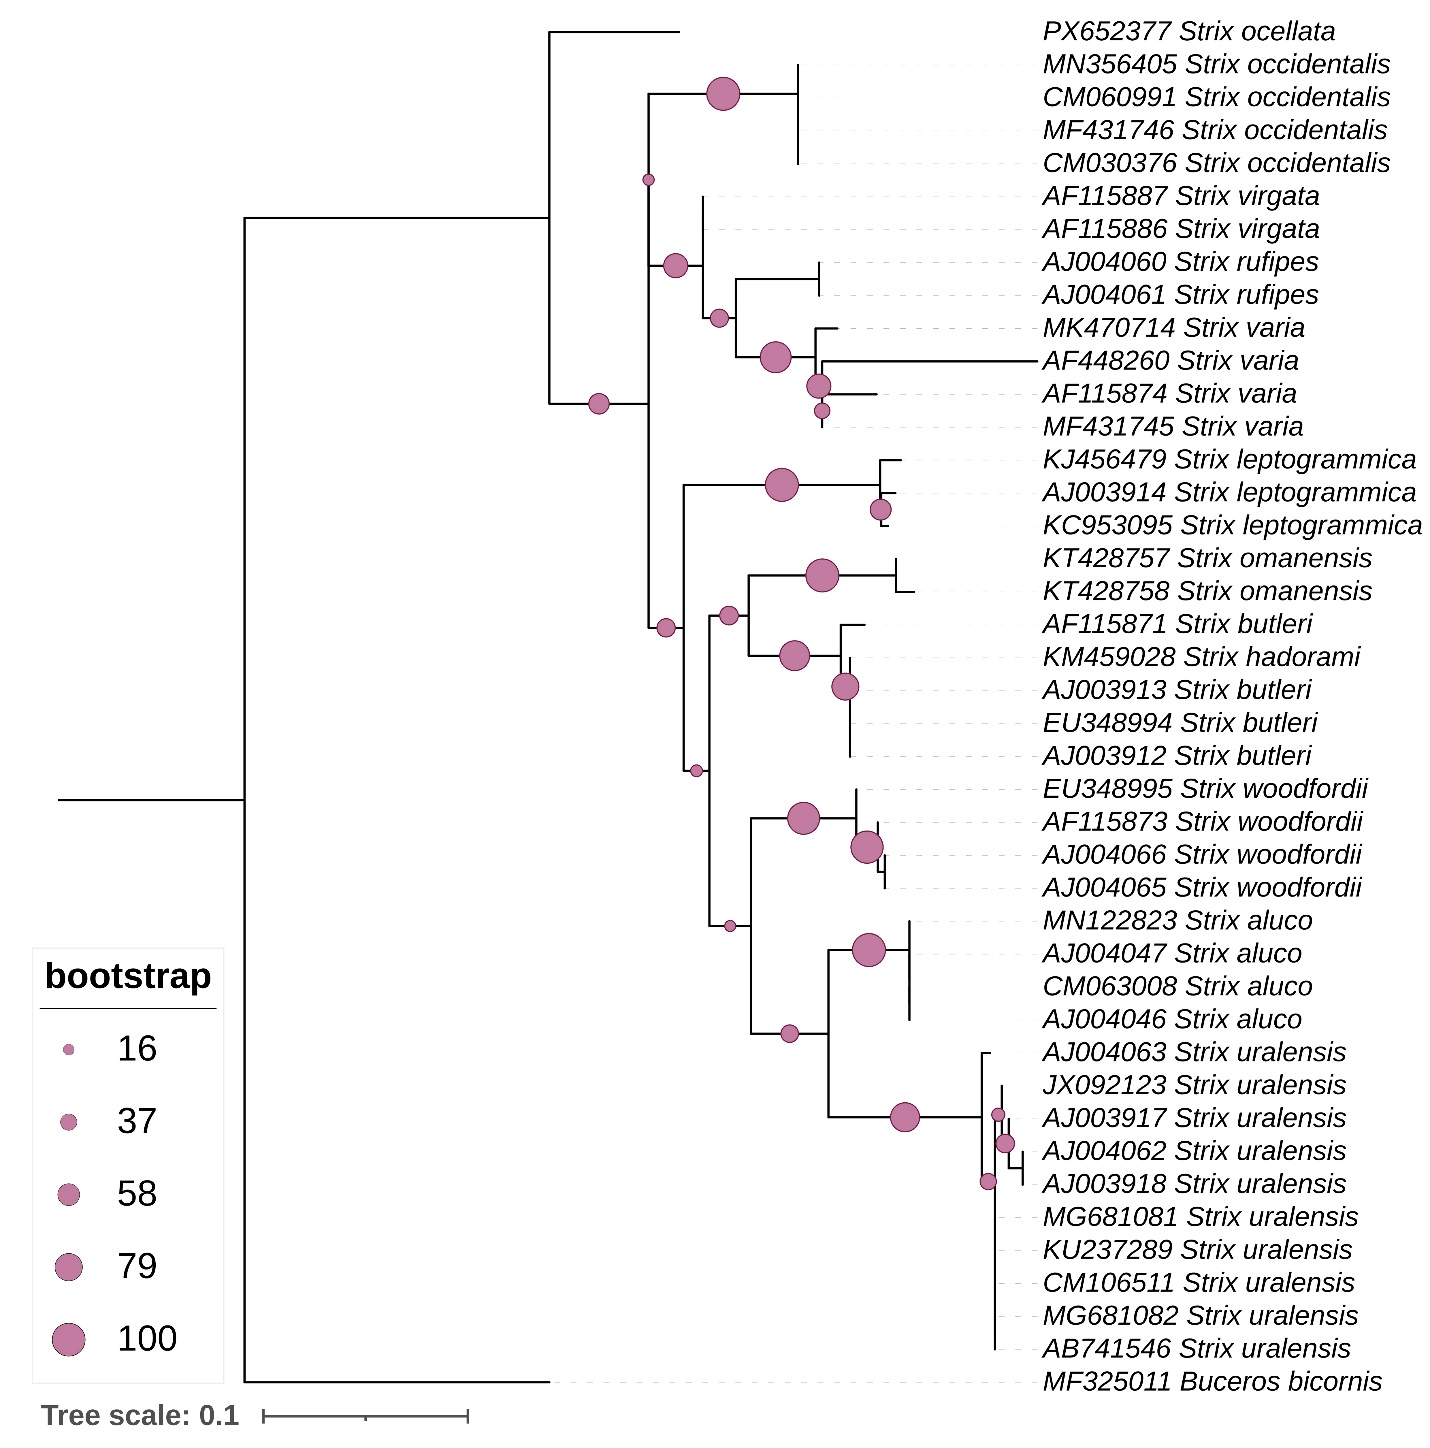


**Supplementary Fig. S5** The ML phylogenetic tree based on partial mtCytb sequences, illustrating matrilineal evolutionary relationships among 12 species within the genus *Strix*. The topology clearly distinguishes *S. ocellata* from other congeners and the bootstrap support values are indicated by purple-colored circles at each node in the topology.

**Supplementary Table S1**. The mitogenome dataset of Strigiformes species, comprising newly generated sequences from this study and sequences retrieved from the GenBank database.

| **No.** | **Species Name** | **Accession No.** | **Reference** |
| --- | --- | --- | --- |
| 1 | *Aegolius funereus* | MN122880 | Unpublished |
| 2 | *Asio flammeus* | KP889214 | Zhang et al. 2016 |
| 3 | *Asio otus* | MG916810 | Lee et al. 2018 |
| 4 | *Athene brama* | KF961185 | Mahmood et al. 2014 |
| 5 | *Athene noctua* | MN651450 | Sun et al. 2020 |
| 6 | *Bubo blakistoni* | LC099106 | Omote 2018 |
| 7 | *Bubo bubo* | OR756278 | Yoon et al. 2025 |
| 8 | *Bubo flavipes* | LC099100 | Omote 2018 |
| 9 | *Bubo scandiacus* | MG681084 | Kang et al. 2018 |
| 10 | *Bubo virginianus* | PX001631 | Unpublished |
| 11 | *Ciccaba nigrolineata* | MN356178 | Feng et al. 2020 |
| 12 | *Glaucidium brasilianum* | MN356303 | Feng et al. 2020 |
| 13 | *Glaucidium brodiei* | KP684122 | Sun et al. 2016 |
| 14 | *Glaucidium cuculoides* | KY092431 | Liu et al. 2019 |
| 15 | *Ninox connivens* | PQ723583 | Lubbe et al. 2025 |
| 16 | *Ninox novaeseelandiae* | AY309457 | Harrison et al. 2004 |
| 17 | *Ninox scutulata* | KT943750 | Unpublished |
| 18 | *Ninox strenua* | KX529654 | Sarker et al. 2016 |
| 19 | *Otus bakkamoena* | KT340631 | Park et al. 2019 |
| 20 | *Otus lettia* | MW364567 | Yu et al. 2021 |
| 21 | *Otus scops* | KT340630 | Park et al. 2019 |
| 22 | *Otus semitorques* | LC541473 | Unpublished |
| 23 | *Otus sunia* | MN276053 | Zhong et al. 2020 |
| 24 | *Phodilus badius* | KF961183 | Mahmood et al. 2014 |
| 25 | *Sceloglaux albifacies* | KX098448 | Wood et al. 2016 |
| 26 | *Strix aluco* | OP850567 | Wang et al. 2023 |
| 27 | *Strix leptogrammica* | KC953095 | Liu et al. 2014 |
| 28 | *Strix occidentalis* | MF431746 | Hanna et al. 2017 |
| 29 | *Strix ocellata* | PX652377 | This Study |
| 30 | *Strix uralensis* | MG681081 | Kang et al. 2018 |
| 31 | *Strix varia* | MF431745 | Hanna et al. 2017 |
| 32 | *Tyto alba* | EU410491 | Pratt et al. 2009 |
| 33 | *Tyto longimembris* | KP893332 | Xu et al. 2016 |

**References**

Feng, S. et al. Dense sampling of bird diversity increases power of comparative genomics. *Nature* **587**, 252–257 (2020).

Hanna, Z. R., Henderson, J. B., Sellas, A. B., Fuchs, J., Bowie, R. C. K. & Dumbacher, J. P. Complete mitochondrial genome sequences of the northern spotted owl (*Strix occidentalis caurina*) and the barred owl (*Strix varia*; Aves: Strigiformes: Strigidae) confirm the presence of a duplicated control region. *PeerJ* **5**, e3901 (2017).

Harrison, G. L., McLenachan, P. A., Phillips, M. J., Slack, K. E., Cooper, A. & Penny, D. Four new avian mitochondrial genomes help get to basic evolutionary questions in the Late Cretaceous. *Mol. Biol. Evol*. **21**, 974–983 (2004).

Kang, H., Li, B., Ma, X. & Xu, Y. Evolutionary progression of mitochondrial gene rearrangements and phylogenetic relationships in Strigidae (Strigiformes). *Gene* **674**, 8–14 (2018).

Lee, M. Y., Lee, S. M., Jeon, H. S., Lee, S. H., Park, J. Y. & An, J. Complete mitochondrial genome of the Northern Long-eared Owl (*Asio otus* Linnaeus, 1758) determined using next-generation sequencing. *Mitochondrial DNA B* **3**, 494–495 (2018).

Liu, G., Zhou, L. & Gu, C. The complete mitochondrial genome of brown wood owl *Strix leptogrammica* (Strigiformes: Strigidae). *Mitochondrial DNA* *A* **25**, 370–371 (2014).

Liu, G., Zhou, L. & Zhao, G. Complete mitochondrial genomes of five raptors and implications for the phylogenetic relationships between owls and nightjars. *PeerJ Prepr*. **7**, e27478v1 (2019).

Lubbe, P., Rawlence, N. J., Dussex, N., Kardialsky, O. & Knapp, M. Plio-Pleistocene environmental changes drove the settlement of Aotearoa New Zealand by Australian open-habitat bird lineages. *Mol. Ecol*. **34**, e17648 (2025).

Mahmood, M. T., McLenachan, P. A., Gibb, G. C. & Penny, D. Phylogenetic position of avian nocturnal and diurnal raptors. *Genome Biol. Evol*. **6**, 326–332 (2014).

Omote, K. Phylogeography of continental and island populations of Blakiston’s Fish-Owl (*Bubo blakistoni*) in northeastern Asia. *J. Raptor Res*. **52**, 31–41 (2018).

Park, C. E., Kim, M. C., Ibal, J. C. P., Pham, H. Q., Park, H. C. & Shin, J. H. The complete mitochondrial genome sequence of *Otus bakkamoena* (Aves, Strigiformes, Strigidae). *Mitochondrial DNA B* **4**, 775–776 (2019).

Park, C. E., Kim, M. C., Ibal, J. C. P., Pham, H. Q., Park, H. C. & Shin, J. H. The complete mitochondrial genome sequence of *Otus scops* (Aves, Strigiformes, Strigidae). *Mitochondrial DNA B* **4**, 764–765 (2019).

Pratt, R. C., Gibb, G. C., Morgan-Richards, M., Phillips, M. J., Hendy, M. D. & Penny, D. Toward resolving deep Neoaves phylogeny: Data, signal enhancement, and priors. *Mol. Biol. Evol*. **26**, 313–326 (2009).

Sarker, S., Das, S., Forwood, J., Helbig, K. & Raidal, S. R. The complete mitochondrial genome sequence of an endangered powerful owl (*Ninox strenua*). *Mitochondrial DNA B* **1**, 722–723 (2016).

Sun, C.-H., Liu, H.-Y., Min, X. & Lu, C.-H. Mitogenome of the little owl *Athene noctua* and phylogenetic analysis of Strigidae. *Int. J. Biol. Macromol*. **151**, 924–931 (2020).

Sun, X., Zhou, W., Sun, Z., Qian, L., Zhang, Y., Pan, T. & Zhang, B. The complete mitochondrial genome of *Glaucidium brodiei* (Strigiformes: Strigidae). *Mitochondrial DNA A* **27**, 2508–2509 (2016).

Wang, Y., Zhan, H., Zhang, Y., Long, Z. & Yang, X. Mitochondrial genome analysis, phylogeny, and divergence time evaluation of *Strix aluco* (Aves, Strigiformes, Strigidae). *Biodivers. Data J*. **11**, e101942 (2023).

Wood, J. R., Mitchell, K. J., Scofield, R. P., De Pietri, V. L., Rawlence, N. J. & Cooper, A. Phylogenetic relationships and terrestrial adaptations of the extinct laughing owl, *Sceloglaux albifacies* (Aves: Strigidae). *Zool. J. Linn. Soc*. **178**, 747–762 (2016).

Xu, P., Li, Y., Miao, L., Xie, G. & Huang, Y. Complete mitochondrial genome of the *Tyto longimembris* (Strigiformes: Tytonidae). *Mitochondrial DNA A* **27**, 2481–2482 (2016).

Yoon, K. B., Han, Y. D., Jung, D. H., Kim, K. Y. & Park, Y. C. Complete mitochondrial genome sequence of the South Korean Eurasian eagle-owl, *Bubo bubo* spp. *kiautschenis* (Strigiformes; Strigidae). *Mitochondrial DNA B* **10**, 1112–1115 (2025).

Yu, J. et al. Characterization of the complete mitochondrial genome of *Otus lettia*: Exploring the mitochondrial evolution and phylogeny of owls (Strigiformes). *Mitochondrial DNA B* **6**, 3443–3451 (2021).

Zhang, Y., Song, T., Pan, T., Sun, X., Sun, Z., Qian, L. & Zhang, B. Complete sequence and gene organization of the mitochondrial genome of *Asio flammeus* (Strigiformes, Strigidae). *Mitochondrial DNA A* **27**, 2665–2667 (2016).

Zhong, Y., Zhou, M., Ouyang, B., Zeng, C., Zhang, M. & Yang, J. Complete mtDNA genome of *Otus sunia* (Aves, Strigidae) and the relaxation of selective constrains on Strigiformes mtDNA following evolution. *Genomics* **112**, 3815–3825 (2020).

**Supplementary Table S2.** The partial mitochondrial COI and Cytb gene sequences of *S. ocellata* generated in this study, along with comparative sequences of other *Strix* species obtained from GenBank database for phylogenetic investigations. ‘*n*’ denotes the number of sequences used in these analyses and ‘–’ indicates that locality information is unavailable.

| **No.** | **Species Name** | **Accession No.** | ***n*** | **Locality Information** | **Reference** |
| --- | --- | --- | --- | --- | --- |
| **mtCOI** | | | | | |
| 1 | *Strix ocellata* | PX652377 | 1 | India | This Study |
| 2 | *Strix aluco* | MZ402657 | 1 | Italy | Unpublished |
| CM063008 | 1 | Spain | Unpublished |
| MN122823 | 1 | – | Unpublished |
| MG737399, MG737400 | 2 | – | Low et al. 2020 |
| GU571634, GU571633 | 2 | Norway | Unpublished |
| MG366136, MG664219 | 2 | South Korea | Unpublished |
| KY754552 | 1 | Austria | Schaffer et al. 2017 |
| KF452084 | 1 | Italy | Pellegrino et al. 2014 |
| 3 | *Strix leptogrammica* | KC953095 | 1 | China | Liu et al. 2014 |
| PV770523 | 1 | Taiwan | Unpublished |
| 4 | *Strix occidentalis* | MF431746 | 1 | USA | Hanna et al. 2017a |
| CM060991, CM030376 | 2 | USA | Hanna et al. 2017b |
| MN356405 | 1 | – | Feng et al. 2020 |
| DQ434177, DQ434178 | 2 | USA | Kerr et al. 2007 |
| 5 | *Strix uralensis* | MG681081, MG681082 | 2 | China | Kang et al. 2018 |
| CM106511 | 1 | Finland | Winter et al. 2025 |
| KU237289 | 1 | – | Unpublished |
| GU571637 | 1 | Norway | Johnsen et al. 2010 |
| GU572109, GU572110 | 2 | Sweden | Johnsen et al. 2010 |
| AB843185, AB843186, AB843781, AB843778 | 4 | – | Saitoh et al. 2014 |
| GQ482681, GQ482682 | 2 | Russia | Kerr et al. 2009a |
| MG677110 | 1 | South Korea | Unpublished |
| LC619131 | 1 | Japan | Unpublished |
| 6 | *Strix varia* | MF431745 | 1 | USA | Hanna et al. 2017a |
| AY666428 | 1 | – | Hebert et al. 2004 |
| DQ434179 | 1 | Canada | Kerr et al. 2007 |
| DQ433225 | 1 | USA | Kerr et al. 2007 |
| KT022232 | 1 | Canada | Unpublished |
| 7 | *Strix davidi* | GQ922637 | 1 | China | Cai et al. 2010 |
| 8 | *Strix hylophila* | KM896578 | 1 | Brazil | Chaves et al. 2015 |
| 9 | *Strix rufipes* | MG263851, MG263850 | 2 | Chile | Colihueque et al. 2021 |
| FJ028332 | 1 | Argentina | Kerr et al. 2009b |
| 10 | *Strix virgata* | JQ174452 | 1 | Brazil | Schindel et al. 2011 |
| JQ174451 | 1 | Panama | Schindel et al. 2011 |
| 11 | *Strix woodfordii* | MK545092 | 1 | Kenya | Unpublished |
| Total | | | 48 |  | |
| **No.** | **Species Name** | **Accession No.** | ***n*** | **Locality Information** | **Reference** |
| **mtCytb** | | | | | |
| 1 | *Strix ocellata* | PX652377 | 1 | India | This Study |
| 2 | *Strix aluco* | CM063008 | 1 | Spain | Unpublished |
| MN122823 | 1 | – | Unpublished |
| AJ004046, AJ004047 | 2 | – | Wink & Heidrich 1999 |
| 3 | *Strix leptogrammica* | KC953095 | 1 | China | Liu et al. 2014 |
| KJ456479 | 1 | – | Price et al. 2014 |
| AJ003914 | 1 | – | Wink & Heidrich 1999 |
| 4 | *Strix occidentalis* | MF431746, CM030376 | 2 | USA | Hanna et al. 2017a |
| CM060991 | 1 | USA | Unpublished |
| MN356405 | 1 | – | Feng et al. 2020 |
| 5 | *Strix uralensis* | MG681081, MG681082 | 2 | China | Kang et al. 2018 |
| CM106511 | 1 | Finland | Winter et al. 2025 |
| KU237289 | 1 | – | Unpublished |
| JX092123 | 1 | – | Hausknecht et al. 2013 |
| AB741546 | 1 | – | Omote et al. 2013 |
| AJ004062, AJ004063, AJ003917, AJ003918 | 4 | – | Wink & Heidrich 1999 |
| 6 | *Strix varia* | MF431745 | 1 | USA | Hanna et al. 2017a |
| MK470714 | 1 | – | Unpublished |
| AF448260 | 1 | USA | Unpublished |
| AF115874 | 1 | – | Roulin et al. 2011 |
| 7 | *Strix butleri* | AF115871 | 1 | – | Unpublished |
| EU348994 | 1 | – | Wink et al. 2009 |
| AJ003913, AJ003912 | 2 | – | Unpublished |
| 8 | *Strix hadorami* | KM459028 | 1 | – | Kirwan et al. 2015 |
| 9 | *Strix omanensis* | KT428757 | 1 | Oman | Robb et al. 2016 |
| KT428758 | 1 | Iran | Robb et al. 2016 |
| 10 | *Strix rufipes* | AJ004061, AJ004060 | 2 | – | Wink & Heidrich 1999 |
| 11 | *Strix virgata* | AF115887, AF115886 | 2 | – | Unpublished |
| 12 | *Strix woodfordii* | AF115873 | 1 | – | Unpublished |
| AJ004066, AJ004065 | 2 | – | Wink & Heidrich 1999 |
| EU348995 | 1 | – | Wink et al. 2009 |
| Total | | | 41 |  | |

**References**

Cai, Y., Yue, B., Jiang, W., Xie, S., Li, J. & Zhou, M. DNA barcoding on subsets of three families in Aves. *Mitochondrial DNA* *A* **21**, 132–137 (2010).

Chaves, B. R. N., Chaves, A. V., Nascimento, A. C. A., Chevitarese, J., Vasconcelos, M. F. & Santos, F. R. Barcoding Neotropical birds: Assessing the impact of nonmonophyly in a highly diverse group. *Mol. Ecol. Resour.* **15**, 921–931 (2015).

Colihueque, N., Gantz, A. & Parraguez, M. Revealing the biodiversity of Chilean birds through the COI barcode approach. *ZooKeys* **1016**, 143–161 (2021).

Feng, S. et al*.* Dense sampling of bird diversity increases power of comparative genomics. *Nature* **587**, 252–257 (2020).

Hanna, Z. R. et al*.* Northern Spotted Owl (*Strix occidentalis caurina*) genome: Divergence with the Barred Owl (*Strix varia*) and characterization of light-associated genes. *Genome Biol. Evol.* **9**, 2522–2545 (2017b).

Hanna, Z. R., Henderson, J. B., Sellas, A. B., Fuchs, J., Bowie, R. C. K. & Dumbacher, J. P. Complete mitochondrial genome sequences of the northern spotted owl (*Strix occidentalis caurina*) and the barred owl (*Strix varia*; Aves: Strigiformes: Strigidae) confirm the presence of a duplicated control region. *PeerJ* **5**, e3901 (2017a).

Hausknecht, R. et al*.* Phylogeographic analysis and genetic cluster recognition for the conservation of Ural Owls (*Strix uralensis*) in Europe. *J. Ornithol.* **155**, 121–134 (2014).

Hebert, P. D., Stoeckle, M. Y., Zemlak, T. S. & Francis, C. M. Identification of birds through DNA barcodes. *PLoS Biol.* **2**, e312 (2004).

Johnsen, A. et al*.* DNA barcoding of Scandinavian birds reveals divergent lineages in trans-Atlantic species. *J. Ornithol.* **151**, 565–578 (2010).

Kang, H., Li, B., Ma, X. & Xu, Y. Evolutionary progression of mitochondrial gene rearrangements and phylogenetic relationships in Strigidae (Strigiformes). *Gene* **674**, 8–14 (2018).

Kerr, K. C. R., Lijtmaer, D. A., Barreira, A. S., Hebert, P. D. N. & Tubaro, P. L. Probing evolutionary patterns in Neotropical birds through DNA barcodes. *PLoS ONE* **4**, e4379 (2009b).

Kerr, K. C. R., Stoeckle, M. Y., Dove, C. J., Weigt, L. A., Francis, C. M. & Hebert, P. D. N. Comprehensive DNA barcode coverage of North American birds. *Mol. Ecol. Notes* **7**, 535–543 (2007).

Kerr, K. C., Birks, S. M., Kalyakin, M. V., Red'kin, Y. A., Koblik, E. A. & Hebert, P. D. Filling the gap—COI barcode resolution in eastern Palearctic birds. *Front. Zool.* **6**, 29 (2009a).

Kirwan, G. M., Schweizer, M. & Copete, J. L. Multiple lines of evidence confirm that Hume’s Owl *Strix butleri* (A. O. Hume, 1878) is two species, with description of an unnamed species (Aves: Non-Passeriformes: Strigidae). *Zootaxa* **3904**, 1 (2015).

Liu, G., Zhou, L. & Gu, C. The complete mitochondrial genome of Brown wood owl *Strix leptogrammica* (Strigiformes: Strigidae). *Mitochondrial DNA* *A* **25**, 370–371 (2014).

Löw, K. et al. Molecular evolution of the proopiomelanocortin system in Barn owl species. *PLoS ONE* **15**, e0231163 (2020).

Omote, K., Nishida, C., Dick, M. H. & Masuda, R. Limited phylogenetic distribution of a long tandem-repeat cluster in the mitochondrial control region in *Bubo* (Aves, Strigidae) and cluster variation in Blakiston’s fish owl (*Bubo blakistoni*). *Mol. Phylogenet. Evol.* **66**, 889–897 (2013).

Pellegrino, I. et al. Phylogeography and Pleistocene refugia of the Little Owl *Athene noctua* inferred from mtDNA sequence data. *Ibis* **156**, 639–657 (2014).

Price, T. D. et al*.* Niche filling slows the diversification of Himalayan songbirds. *Nature* **509**, 222–225 (2014).

Robb, M. S. et al*.* The rediscovery of *Strix butleri* (Hume, 1878) in Oman and Iran, with molecular resolution of the identity of *Strix omanensis* Robb, van den Berg & Constantine, 2013. *Avian Res.* **7**, 7 (2016).

Roulin, A., Burri, R. & Antoniazza, S. Owl melanin-based plumage redness is more frequent near than away from the equator: Implications on the effect of climate change on biodiversity. *Biol. J. Linn. Soc.* **102**, 573–582 (2011).

Saitoh, T. et al*.* DNA barcoding reveals 24 distinct lineages as cryptic bird species candidates in and around the Japanese Archipelago. *Mol. Ecol. Resour.* **15**, 177–186 (2015).

Schäffer, S., Zachos, F. E. & Koblmüller, S. Opening the treasure chest: A DNA-barcoding primer set for most higher taxa of Central European birds and mammals from museum collections. *PLoS ONE* **12**, e0174449 (2017).

Schindel, D. E. et al. Project description: DNA barcodes of bird species in the National Museum of Natural History, Smithsonian Institution, USA. *ZooKeys* **152**, 87–92 (2011).

Wink, M. & Heidrich, P. Molecular evolution and systematics of owls (Strigiformes). In *Owls of the World* (eds König, C., Weick, F. & Becking, J. H.) 39–57 (Pica Press, 1999).

Wink, M., El-Sayed, A.-A., Sauer-Gürth, H. & González, J. Molecular phylogeny of owls (Strigiformes) inferred from DNA sequences of the mitochondrial cytochrome *b* and the nuclear RAG-1 gene. *Ardea* **97**, 581–591 (2009).

Winter, S. et al*.* Chromosome-level genome assembly and transcriptome analysis of the Ural owl, *Strix uralensis* Pallas, 1771. *J. Hered.* **117**, 107–114 (2026).

**Supplementary Table S3**. The intergenic and overlapping nucleotide regions in the mitogenomes of different *Strix* species.

| **Gene** | ***Strix ocellata*** | | | ***Strix aluco*** | | | ***Strix leptogrammica*** | | | ***Strix occidentalis*** | | | ***Strix uralensis*** | | | ***Strix varia*** | | |
| --- | --- | --- | --- | --- | --- | --- | --- | --- | --- | --- | --- | --- | --- | --- | --- | --- | --- | --- |
| **Start** | **End** | **IN** | **Start** | **End** | **IN** | **Start** | **End** | **IN** | **Start** | **End** | **IN** | **Start** | **End** | **IN** | **Start** | **End** | **IN** |
| tRNA-Phe (F) | 1 | 67 | -2 | 1 | 68 | -1 | 1 | 66 | 0 | 1 | 68 | 0 | 1 | 69 | 0 | 1 | 68 | 0 |
| 12S rRNA | 66 | 1051 | -2 | 68 | 1050 | -1 | 67 | 1052 | 0 | 69 | 1054 | 0 | 70 | 1044 | 0 | 69 | 1065 | 0 |
| tRNA-Val (V) | 1050 | 1122 | 1 | 1050 | 1121 | 12 | 1053 | 1124 | 0 | 1055 | 1126 | 0 | 1045 | 1116 | 0 | 1066 | 1137 | 0 |
| 16S rRNA | 1124 | 2706 | -2 | 1134 | 2709 | -1 | 1125 | 2709 | 0 | 1127 | 2722 | 0 | 1117 | 2697 | 0 | 1138 | 2741 | 0 |
| tRNA-Leu (L2) | 2705 | 2779 | 13 | 2709 | 2783 | 14 | 2710 | 2784 | 0 | 2723 | 2795 | 11 | 2698 | 2772 | 14 | 2742 | 2816 | 11 |
| ND1 | 2793 | 3752 | -3 | 2798 | 3757 | -2 | 2785 | 3759 | -2 | 2807 | 3766 | -2 | 2787 | 3746 | -2 | 2828 | 3787 | -2 |
| tRNA-Ile (I) | 3750 | 3822 | 10 | 3756 | 3827 | 11 | 3758 | 3829 | 11 | 3765 | 3836 | 11 | 3745 | 3816 | 11 | 3786 | 3857 | 11 |
| tRNA-Gln (Q) | 3833 | 3904 | -1 | 3839 | 3909 | -1 | 3841 | 3911 | -1 | 3848 | 3918 | -1 | 3828 | 3898 | -1 | 3869 | 3939 | -1 |
| tRNA-Met (M) | 3904 | 3973 | 0 | 3909 | 3977 | 0 | 3911 | 3979 | 0 | 3918 | 3986 | 0 | 3898 | 3966 | 0 | 3939 | 4007 | 0 |
| ND2 | 3974 | 5014 | -3 | 3978 | 5016 | 0 | 3980 | 5018 | 0 | 3987 | 5025 | 0 | 3967 | 5005 | 0 | 4008 | 5046 | 0 |
| tRNA-Trp (W) | 5012 | 5088 | 0 | 5017 | 5091 | 1 | 5019 | 5093 | 1 | 5026 | 5101 | 1 | 5006 | 5080 | 1 | 5047 | 5122 | 1 |
| tRNA-Ala (A) | 5089 | 5158 | 0 | 5093 | 5161 | 1 | 5095 | 5163 | 1 | 5103 | 5171 | 1 | 5082 | 5150 | 1 | 5124 | 5192 | 1 |
| tRNA-Asn (N) | 5159 | 5234 | 1 | 5163 | 5236 | 2 | 5165 | 5238 | 2 | 5173 | 5246 | 2 | 5152 | 5225 | 2 | 5194 | 5267 | 2 |
| tRNA-Cys (C) | 5236 | 5305 | -2 | 5239 | 5305 | -1 | 5241 | 5309 | -1 | 5249 | 5317 | 0 | 5228 | 5294 | 0 | 5270 | 5338 | 0 |
| tRNA-Tyr (Y) | 5304 | 5377 | 1 | 5305 | 5376 | 1 | 5309 | 5380 | 1 | 5318 | 5388 | 1 | 5295 | 5365 | 1 | 5339 | 5409 | 1 |
| COI | 5379 | 6929 | -10 | 5378 | 6928 | -9 | 5382 | 6932 | -9 | 5390 | 6940 | -9 | 5367 | 6917 | -9 | 5411 | 6961 | -9 |
| tRNA-Ser (S2) | 6920 | 6994 | 2 | 6920 | 6991 | 3 | 6924 | 6994 | 4 | 6932 | 7003 | 3 | 6909 | 6980 | 3 | 6953 | 7024 | 3 |
| tRNA-Asp (D) | 6997 | 7066 | 2 | 6995 | 7063 | 2 | 6999 | 7067 | 2 | 7007 | 7075 | 2 | 6984 | 7052 | 3 | 7028 | 7096 | 2 |
| COII | 7069 | 7752 | 8 | 7066 | 7749 | 9 | 7070 | 7771 | 1 | 7078 | 7761 | 9 | 7056 | 7739 | 9 | 7099 | 7782 | 9 |
| tRNA-Lys (K) | 7761 | 7829 | 1 | 7759 | 7828 | 1 | 7773 | 7842 | 1 | 7771 | 7841 | 1 | 7749 | 7818 | 1 | 7792 | 7860 | 1 |
| ATP8 | 7831 | 7998 | -10 | 7830 | 7997 | -1 | 7844 | 8011 | -10 | 7843 | 8010 | -10 | 7820 | 7987 | -10 | 7862 | 8029 | -10 |
| ATP6 | 7989 | 8672 | -1 | 7997 | 8671 | -1 | 8002 | 8685 | -1 | 8001 | 8684 | -1 | 7978 | 8661 | -1 | 8020 | 8703 | -1 |
| COIII | 8672 | 9455 | -1 | 8671 | 9454 | -1 | 8685 | 9468 | 0 | 8684 | 9467 | 0 | 8661 | 9444 | 0 | 8703 | 9486 | -1 |
| tRNA-Gly (G) | 9455 | 9524 | 0 | 9454 | 9523 | 0 | 9469 | 9537 | 0 | 9468 | 9536 | 0 | 9445 | 9513 | 0 | 9486 | 9555 | 0 |
| ND3 | 9525 | 9876 | 1 | 9524 | 9875 | 2 | 9538 | 9889 | 2 | 9537 | 9888 | 2 | 9514 | 9865 | 2 | 9556 | 9907 | 2 |
| tRNA-Arg (R) | 9878 | 9947 | 1 | 9878 | 9946 | 1 | 9892 | 9960 | 1 | 9891 | 9960 | 1 | 9868 | 9936 | 1 | 9910 | 9979 | 1 |
| ND4L | 9949 | 10245 | -7 | 9948 | 10244 | -7 | 9962 | 10258 | -7 | 9962 | 10258 | -7 | 9938 | 10234 | -7 | 9981 | 10277 | -7 |
| ND4 | 10239 | 11616 | -1 | 10238 | 11615 | 0 | 10252 | 11629 | 0 | 10252 | 11629 | 0 | 10228 | 11605 | 0 | 10271 | 11648 | 0 |
| tRNA-His (H) | 11616 | 11686 | 2 | 11616 | 11685 | 2 | 11630 | 11699 | 2 | 11630 | 11699 | 2 | 11606 | 11675 | 2 | 11649 | 11718 | 2 |
| tRNA-Ser (S1) | 11689 | 11754 | -2 | 11688 | 11753 | 2 | 11702 | 11767 | 2 | 11702 | 11767 | 2 | 11678 | 11743 | 2 | 11721 | 11786 | 2 |
| tRNA-Leu (L1) | 11753 | 11824 | 0 | 11756 | 11826 | 0 | 11770 | 11840 | 0 | 11770 | 11840 | 0 | 11746 | 11816 | 0 | 11789 | 11859 | 0 |
| ND5 | 11825 | 13645 | 3 | 11827 | 13647 | 5 | 11841 | 13663 | 6 | 11841 | 13661 | 4 | 11817 | 13637 | 5 | 11860 | 13680 | 4 |
| Cytb | 13649 | 14791 | 0 | 13653 | 14795 | 1 | 13670 | 14812 | 1 | 13666 | 14808 | 1 | 13643 | 14785 | 1 | 13685 | 14827 | 1 |
| tRNA-Thr (T) | 14792 | 14861 | 0 | 14797 | 14866 | 728 | 14814 | 14882 | 0 | 14810 | 14878 | 0 | 14787 | 14855 | 74 | 14829 | 14898 | 0 |
| Control region | 14862 | 16555 | 0 | 15595 | 15792 | 616 |  |  |  | 14879 | 16899 | 0 | 14930 | 16394 | 0 | 14899 | 16584 | 0 |
| tRNA-Pro (P) | 16556 | 16626 | 6 | 16409 | 16478 | 6 | 14883 | 14952 | 13 | 16900 | 16969 | 6 | 16395 | 16464 | 6 | 16585 | 16654 | 4 |
| ND6 | 16633 | 17154 | 2 | 16485 | 17006 | 3 | 14966 | 15490 | 3 | 16976 | 17494 | 3 | 16471 | 16992 | 3 | 16659 | 17180 | 3 |
| tRNA-Glu (E) | 17157 | 17230 | 0 | 17010 | 17083 | 584 | 15494 | 15566 | 0 | 17498 | 17570 | 0 | 16996 | 17068 | 0 | 17184 | 17256 | 0 |
| Control region | 17231 | 19135 | . | 17668 | 17865 | . | 15567 | 16307 | . | 17571 | 19889 | . | 17069 | 18708 | . | 17257 | 18975 | . |

**Supplementary Table S4**. The comparative analysis of start and stop codons in 13 PCGs across different *Strix* species.

| **Gene** | ***Strix ocellata*** | | ***Strix aluco*** | | ***Strix leptogrammica*** | | ***Strix occidentalis*** | | ***Strix uralensis*** | | ***Strix varia*** | |
| --- | --- | --- | --- | --- | --- | --- | --- | --- | --- | --- | --- | --- |
| **Start** | **Stop** | **Start** | **Stop** | **Start** | **Stop** | **Start** | **Stop** | **Start** | **Stop** | **Start** | **Stop** |
| ATP6 | ATG | TAA | ATG | TAA | ATG | TAA | ATG | TAA | ATG | TAA | ATG | TAA |
| ATP8 | ATG | TAA | ATG | TAA | ATG | TAA | ATG | TAA | ATG | TAA | ATG | TAA |
| COI | ATG | AGG | ATG | AGG | ATG | AGG | ATG | AGG | ATG | AGG | ATG | AGG |
| COII | ATG | TAA | ATG | TAA | ATG | TAA | ATG | TAG | ATG | TAA | ATG | TAA |
| COIII | ATG | T-- | ATG | T-- | ATG | T-- | ATG | T-- | ATG | T-- | ATG | T-- |
| Cytb | ATG | TAA | ATG | TAA | ATG | TAG | ATG | TAA | ATG | TAA | ATG | TAA |
| ND1 | ATG | AGG | ATG | AGG | ATG | AGG | ATG | AGG | ATG | AGG | ATG | AGG |
| ND2 | ATG | T-- | ATG | T-- | ATG | T-- | ATG | T-- | ATG | T-- | ATG | T-- |
| ND3 | ATA | TAA | ATA | TAA | ATA | TAG | ATA | TAA | ATA | TAA | ATA | TAG |
| ND4 | ATG | T-- | ATG | T-- | ATG | T-- | ATG | T-- | ATG | T-- | ATG | T-- |
| ND4L | ATG | TAA | ATG | TAA | ATG | TAA | ATG | TAA | ATG | TAA | ATG | TAA |
| ND5 | ATG | TAA | TTG | TAA | ATG | TA- | ATG | TAA | TTG | TAA | ATG | TAA |
| ND6 | ATG | TAG | ATG | TAG | ATG | TAG | ATG | TAG | ATG | TAG | ATG | TAG |

**Supplementary Table S5**. The Ka/Ks ratios of 13 PCGs across different *Strix* species.

| **Species Name** | **PCGs** | | | | | | | | | | | | |
| --- | --- | --- | --- | --- | --- | --- | --- | --- | --- | --- | --- | --- | --- |
| **ND1** | **ND2** | **COI** | **COII** | **ATP8** | **ATP6** | **COIII** | **ND3** | **ND4L** | **ND4** | **ND5** | **ND6** | **Cytb** |
| *S. aluco* | 0.0681 | 0.1188 | 0.0179 | 0.0460 | 0.1558 | 0.0652 | 0.0395 | 0.6376 | 0.0787 | 0.1082 | 0.2146 | 0.1065 | 0.0535 |
| *S. leptogrammica* | 0.0667 | 0.1217 | 0.0344 | 0.0422 | 0.2791 | 0.0780 | 0.0373 | 0.5296 | 0.0978 | 0.1324 | 0.2094 | 0.2191 | 0.2092 |
| *S. occidentalis* | 0.0426 | 0.0986 | 0.0203 | 0.0394 | 0.2327 | 0.1133 | 0.0446 | 0.6404 | 0.0818 | 0.1147 | 0.1767 | 0.1300 | 0.0582 |
| *S. uralensis* | 0.0530 | 0.1314 | 0.0179 | 0.0297 | 0.3449 | 0.0783 | 0.0426 | 0.5144 | 0.0861 | 0.0950 | 0.2324 | 0.1035 | 0.0517 |
| *S. varia* | 0.0416 | 0.1161 | 0.0187 | 0.0347 | 0.1528 | 0.0857 | 0.0383 | 0.6458 | 0.0995 | 0.0854 | 0.1732 | 0.0945 | 0.0564 |
| Average | 0.0544 | 0.1173 | 0.0219 | 0.0384 | 0.2331 | 0.0841 | 0.0405 | 0.5936 | 0.0888 | 0.1071 | 0.2013 | 0.1307 | 0.0858 |
| STDEV | 0.0127 | 0.0119 | 0.0071 | 0.0064 | 0.0822 | 0.0179 | 0.0030 | 0.0656 | 0.0094 | 0.0182 | 0.0255 | 0.0511 | 0.0690 |

**Supplementary Table S6**. The RSCU values of 13 PCGs across different *Strix* species.

| ***Strix ocellata*** | | | | | | | | | | | |
| --- | --- | --- | --- | --- | --- | --- | --- | --- | --- | --- | --- |
| Codon | Count | RSCU | Codon | Count | RSCU | Codon | Count | RSCU | Codon | Count | RSCU |
| UUU(F) | 32 | 0.70 | UCU(S) | 39 | 0.70 | UAU(Y) | 58 | 0.97 | UGU(C) | 38 | 1.01 |
| UUC(F) | 60 | 1.30 | UCC(S) | 51 | 0.92 | UAC(Y) | 61 | 1.03 | UGC(C) | 37 | 0.99 |
| UUA(L) | 38 | 0.43 | UCA(S) | 53 | 0.96 | UAA(*) | 29 | 1.04 | UGA(*) | 47 | 1.68 |
| UUG(L) | 9 | 0.10 | UCG(S) | 13 | 0.23 | UAG(*) | 8 | 0.29 | UGG(W) | 42 | 1.00 |
| CUU(L) | 120 | 1.34 | CCU(P) | 203 | 1.76 | CAU(H) | 124 | 0.97 | CGU(R) | 35 | 0.75 |
| CUC(L) | 144 | 1.61 | CCC(P) | 119 | 1.03 | CAC(H) | 131 | 1.03 | CGC(R) | 41 | 0.88 |
| CUA(L) | 168 | 1.88 | CCA(P) | 118 | 1.02 | CAA(Q) | 92 | 1.79 | CGA(R) | 43 | 0.92 |
| CUG(L) | 57 | 0.64 | CCG(P) | 21 | 0.18 | CAG(Q) | 11 | 0.21 | CGG(R) | 35 | 0.75 |
| AUU(I) | 101 | 1.03 | ACU(T) | 128 | 1.38 | AAU(N) | 105 | 0.99 | AGU(S) | 50 | 0.90 |
| AUC(I) | 108 | 1.11 | ACC(T) | 138 | 1.48 | AAC(N) | 107 | 1.01 | AGC(S) | 126 | 2.28 |
| AUA(I) | 84 | 0.86 | ACA(T) | 92 | 0.99 | AAA(K) | 85 | 1.67 | AGA(R) | 60 | 1.29 |
| AUG(M) | 51 | 1.00 | ACG(T) | 14 | 0.15 | AAG(K) | 17 | 0.33 | AGG(R) | 66 | 1.41 |
| GUU(V) | 19 | 1.25 | GCU(A) | 31 | 0.95 | GAU(D) | 14 | 0.82 | GGU(G) | 23 | 0.75 |
| GUC(V) | 12 | 0.79 | GCC(A) | 60 | 1.85 | GAC(D) | 20 | 1.18 | GGC(G) | 38 | 1.24 |
| GUA(V) | 24 | 1.57 | GCA(A) | 31 | 0.95 | GAA(E) | 31 | 1.68 | GGA(G) | 35 | 1.14 |
| GUG(V) | 6 | 0.39 | GCG(A) | 8 | 0.25 | GAG(E) | 6 | 0.32 | GGG(G) | 27 | 0.88 |
| ***Strix aluco*** | | | | | | | | | | | |
| Codon | Count | RSCU | Codon | Count | RSCU | Codon | Count | RSCU | Codon | Count | RSCU |
| UUU(F) | 47 | 0.71 | UCU(S) | 46 | 0.76 | UAU(Y) | 67 | 0.89 | UGU(C) | 25 | 0.82 |
| UUC(F) | 86 | 1.29 | UCC(S) | 94 | 1.56 | UAC(Y) | 84 | 1.11 | UGC(C) | 36 | 1.18 |
| UUA(L) | 50 | 0.57 | UCA(S) | 92 | 1.53 | UAA(*) | 46 | 1.04 | UGA(*) | 56 | 1.26 |
| UUG(L) | 22 | 0.25 | UCG(S) | 22 | 0.37 | UAG(*) | 31 | 0.70 | UGG(W) | 33 | 1.00 |
| CUU(L) | 86 | 0.99 | CCU(P) | 124 | 1.21 | CAU(H) | 85 | 0.92 | CGU(R) | 27 | 0.86 |
| CUC(L) | 138 | 1.58 | CCC(P) | 142 | 1.39 | CAC(H) | 100 | 1.08 | CGC(R) | 28 | 0.89 |
| CUA(L) | 171 | 1.96 | CCA(P) | 110 | 1.07 | CAA(Q) | 88 | 1.59 | CGA(R) | 28 | 0.89 |
| CUG(L) | 56 | 0.64 | CCG(P) | 34 | 0.33 | CAG(Q) | 23 | 0.41 | CGG(R) | 27 | 0.86 |
| AUU(I) | 76 | 0.90 | ACU(T) | 90 | 1.04 | AAU(N) | 78 | 0.87 | AGU(S) | 30 | 0.50 |
| AUC(I) | 112 | 1.32 | ACC(T) | 135 | 1.56 | AAC(N) | 102 | 1.13 | AGC(S) | 77 | 1.28 |
| AUA(I) | 66 | 0.78 | ACA(T) | 104 | 1.20 | AAA(K) | 85 | 1.73 | AGA(R) | 41 | 1.30 |
| AUG(M) | 43 | 1.00 | ACG(T) | 17 | 0.20 | AAG(K) | 13 | 0.27 | AGG(R) | 38 | 1.21 |
| GUU(V) | 24 | 0.87 | GCU(A) | 48 | 0.91 | GAU(D) | 24 | 0.81 | GGU(G) | 12 | 0.34 |
| GUC(V) | 25 | 0.91 | GCC(A) | 104 | 1.98 | GAC(D) | 35 | 1.19 | GGC(G) | 49 | 1.37 |
| GUA(V) | 33 | 1.20 | GCA(A) | 47 | 0.90 | GAA(E) | 41 | 1.34 | GGA(G) | 40 | 1.12 |
| GUG(V) | 28 | 1.02 | GCG(A) | 11 | 0.21 | GAG(E) | 20 | 0.66 | GGG(G) | 42 | 1.17 |
| ***Strix leptogrammica*** | | | | | | | | | | | |
| Codon | Count | RSCU | Codon | Count | RSCU | Codon | Count | RSCU | Codon | Count | RSCU |
| UUU(F) | 34 | 0.64 | UCU(S) | 57 | 0.94 | UAU(Y) | 57 | 0.78 | UGU(C) | 31 | 0.90 |
| UUC(F) | 73 | 1.36 | UCC(S) | 98 | 1.62 | UAC(Y) | 90 | 1.22 | UGC(C) | 38 | 1.10 |
| UUA(L) | 43 | 0.53 | UCA(S) | 87 | 1.43 | UAA(*) | 71 | 1.48 | UGA(*) | 30 | 0.63 |
| UUG(L) | 33 | 0.41 | UCG(S) | 26 | 0.43 | UAG(*) | 43 | 0.90 | UGG(W) | 60 | 1.00 |
| CUU(L) | 76 | 0.94 | CCU(P) | 145 | 1.27 | CAU(H) | 111 | 1.02 | CGU(R) | 34 | 1.03 |
| CUC(L) | 118 | 1.46 | CCC(P) | 160 | 1.40 | CAC(H) | 107 | 0.98 | CGC(R) | 29 | 0.88 |
| CUA(L) | 156 | 1.93 | CCA(P) | 117 | 1.02 | CAA(Q) | 98 | 1.43 | CGA(R) | 36 | 1.09 |
| CUG(L) | 58 | 0.72 | CCG(P) | 36 | 0.31 | CAG(Q) | 39 | 0.57 | CGG(R) | 22 | 0.67 |
| AUU(I) | 72 | 0.90 | ACU(T) | 97 | 1.10 | AAU(N) | 80 | 0.88 | AGU(S) | 31 | 0.51 |
| AUC(I) | 103 | 1.29 | ACC(T) | 136 | 1.54 | AAC(N) | 101 | 1.12 | AGC(S) | 65 | 1.07 |
| AUA(I) | 64 | 0.80 | ACA(T) | 101 | 1.14 | AAA(K) | 78 | 1.64 | AGA(R) | 39 | 1.18 |
| AUG(M) | 43 | 1.00 | ACG(T) | 20 | 0.23 | AAG(K) | 17 | 0.36 | AGG(R) | 38 | 1.15 |
| GUU(V) | 8 | 0.44 | GCU(A) | 47 | 1.02 | GAU(D) | 25 | 1.02 | GGU(G) | 22 | 0.63 |
| GUC(V) | 21 | 1.17 | GCC(A) | 80 | 1.73 | GAC(D) | 24 | 0.98 | GGC(G) | 46 | 1.32 |
| GUA(V) | 30 | 1.67 | GCA(A) | 45 | 0.97 | GAA(E) | 45 | 1.43 | GGA(G) | 38 | 1.09 |
| GUG(V) | 13 | 0.72 | GCG(A) | 13 | 0.28 | GAG(E) | 18 | 0.57 | GGG(G) | 33 | 0.95 |
| ***Strix occidentalis*** | | | | | | | | | | | |
| Codon | Count | RSCU | Codon | Count | RSCU | Codon | Count | RSCU | Codon | Count | RSCU |
| UUU(F) | 46 | 0.75 | UCU(S) | 68 | 1.05 | UAU(Y) | 66 | 0.87 | UGU(C) | 20 | 0.73 |
| UUC(F) | 76 | 1.25 | UCC(S) | 91 | 1.41 | UAC(Y) | 85 | 1.13 | UGC(C) | 35 | 1.27 |
| UUA(L) | 66 | 0.75 | UCA(S) | 100 | 1.55 | UAA(*) | 49 | 1.13 | UGA(*) | 49 | 1.13 |
| UUG(L) | 32 | 0.36 | UCG(S) | 15 | 0.23 | UAG(*) | 32 | 0.74 | UGG(W) | 37 | 1.00 |
| CUU(L) | 93 | 1.06 | CCU(P) | 103 | 1.05 | CAU(H) | 93 | 0.94 | CGU(R) | 26 | 0.86 |
| CUC(L) | 128 | 1.45 | CCC(P) | 137 | 1.40 | CAC(H) | 104 | 1.06 | CGC(R) | 28 | 0.92 |
| CUA(L) | 161 | 1.83 | CCA(P) | 123 | 1.26 | CAA(Q) | 90 | 1.58 | CGA(R) | 32 | 1.05 |
| CUG(L) | 48 | 0.55 | CCG(P) | 29 | 0.30 | CAG(Q) | 24 | 0.42 | CGG(R) | 21 | 0.69 |
| AUU(I) | 89 | 0.96 | ACU(T) | 105 | 1.21 | AAU(N) | 83 | 0.86 | AGU(S) | 33 | 0.51 |
| AUC(I) | 120 | 1.29 | ACC(T) | 131 | 1.51 | AAC(N) | 109 | 1.14 | AGC(S) | 80 | 1.24 |
| AUA(I) | 70 | 0.75 | ACA(T) | 101 | 1.16 | AAA(K) | 86 | 1.72 | AGA(R) | 39 | 1.29 |
| AUG(M) | 42 | 1.00 | ACG(T) | 11 | 0.13 | AAG(K) | 14 | 0.28 | AGG(R) | 36 | 1.19 |
| GUU(V) | 21 | 0.83 | GCU(A) | 40 | 0.88 | GAU(D) | 19 | 0.67 | GGU(G) | 16 | 0.48 |
| GUC(V) | 17 | 0.67 | GCC(A) | 83 | 1.82 | GAC(D) | 38 | 1.33 | GGC(G) | 38 | 1.13 |
| GUA(V) | 35 | 1.39 | GCA(A) | 50 | 1.10 | GAA(E) | 44 | 1.40 | GGA(G) | 42 | 1.25 |
| GUG(V) | 28 | 1.11 | GCG(A) | 9 | 0.20 | GAG(E) | 19 | 0.60 | GGG(G) | 38 | 1.13 |
| ***Strix uralensis*** | | | | | | | | | | | |
| Codon | Count | RSCU | Codon | Count | RSCU | Codon | Count | RSCU | Codon | Count | RSCU |
| UUU(F) | 40 | 0.62 | UCU(S) | 53 | 0.88 | UAU(Y) | 60 | 0.84 | UGU(C) | 20 | 0.70 |
| UUC(F) | 90 | 1.38 | UCC(S) | 84 | 1.40 | UAC(Y) | 83 | 1.16 | UGC(C) | 37 | 1.30 |
| UUA(L) | 39 | 0.43 | UCA(S) | 92 | 1.53 | UAA(*) | 52 | 1.21 | UGA(*) | 47 | 1.09 |
| UUG(L) | 30 | 0.33 | UCG(S) | 22 | 0.37 | UAG(*) | 30 | 0.70 | UGG(W) | 34 | 1.00 |
| CUU(L) | 97 | 1.08 | CCU(P) | 117 | 1.16 | CAU(H) | 88 | 0.92 | CGU(R) | 35 | 1.07 |
| CUC(L) | 138 | 1.54 | CCC(P) | 141 | 1.40 | CAC(H) | 103 | 1.08 | CGC(R) | 28 | 0.85 |
| CUA(L) | 169 | 1.88 | CCA(P) | 119 | 1.18 | CAA(Q) | 81 | 1.50 | CGA(R) | 34 | 1.04 |
| CUG(L) | 65 | 0.72 | CCG(P) | 26 | 0.26 | CAG(Q) | 27 | 0.50 | CGG(R) | 27 | 0.82 |
| AUU(I) | 72 | 0.84 | ACU(T) | 106 | 1.20 | AAU(N) | 75 | 0.84 | AGU(S) | 29 | 0.48 |
| AUC(I) | 117 | 1.36 | ACC(T) | 129 | 1.47 | AAC(N) | 103 | 1.16 | AGC(S) | 81 | 1.35 |
| AUA(I) | 69 | 0.80 | ACA(T) | 101 | 1.15 | AAA(K) | 78 | 1.54 | AGA(R) | 37 | 1.13 |
| AUG(M) | 42 | 1.00 | ACG(T) | 16 | 0.18 | AAG(K) | 23 | 0.46 | AGG(R) | 36 | 1.10 |
| GUU(V) | 26 | 0.96 | GCU(A) | 41 | 0.82 | GAU(D) | 22 | 0.77 | GGU(G) | 12 | 0.33 |
| GUC(V) | 19 | 0.70 | GCC(A) | 99 | 1.97 | GAC(D) | 35 | 1.23 | GGC(G) | 49 | 1.33 |
| GUA(V) | 39 | 1.44 | GCA(A) | 50 | 1.00 | GAA(E) | 42 | 1.42 | GGA(G) | 40 | 1.09 |
| GUG(V) | 24 | 0.89 | GCG(A) | 11 | 0.22 | GAG(E) | 17 | 0.58 | GGG(G) | 46 | 1.25 |
| ***Strix varia*** | | | | | | | | | | | |
| Codon | Count | RSCU | Codon | Count | RSCU | Codon | Count | RSCU | Codon | Count | RSCU |
| UUU(F) | 43 | 0.68 | UCU(S) | 51 | 0.82 | UAU(Y) | 66 | 0.81 | UGU(C) | 23 | 0.87 |
| UUC(F) | 83 | 1.32 | UCC(S) | 93 | 1.50 | UAC(Y) | 97 | 1.19 | UGC(C) | 30 | 1.13 |
| UUA(L) | 34 | 0.38 | UCA(S) | 90 | 1.45 | UAA(*) | 50 | 1.18 | UGA(*) | 52 | 1.23 |
| UUG(L) | 31 | 0.35 | UCG(S) | 24 | 0.39 | UAG(*) | 25 | 0.59 | UGG(W) | 33 | 1.00 |
| CUU(L) | 90 | 1.02 | CCU(P) | 113 | 1.16 | CAU(H) | 92 | 0.96 | CGU(R) | 20 | 0.60 |
| CUC(L) | 126 | 1.42 | CCC(P) | 141 | 1.45 | CAC(H) | 100 | 1.04 | CGC(R) | 35 | 1.06 |
| CUA(L) | 190 | 2.15 | CCA(P) | 113 | 1.16 | CAA(Q) | 85 | 1.55 | CGA(R) | 35 | 1.06 |
| CUG(L) | 60 | 0.68 | CCG(P) | 23 | 0.24 | CAG(Q) | 25 | 0.45 | CGG(R) | 30 | 0.90 |
| AUU(I) | 75 | 0.85 | ACU(T) | 97 | 1.16 | AAU(N) | 78 | 0.84 | AGU(S) | 37 | 0.60 |
| AUC(I) | 118 | 1.34 | ACC(T) | 137 | 1.64 | AAC(N) | 108 | 1.16 | AGC(S) | 78 | 1.25 |
| AUA(I) | 72 | 0.82 | ACA(T) | 87 | 1.04 | AAA(K) | 81 | 1.71 | AGA(R) | 42 | 1.27 |
| AUG(M) | 38 | 1.00 | ACG(T) | 14 | 0.17 | AAG(K) | 14 | 0.29 | AGG(R) | 37 | 1.12 |
| GUU(V) | 25 | 0.88 | GCU(A) | 48 | 0.92 | GAU(D) | 19 | 0.73 | GGU(G) | 16 | 0.45 |
| GUC(V) | 19 | 0.67 | GCC(A) | 90 | 1.72 | GAC(D) | 33 | 1.27 | GGC(G) | 46 | 1.29 |
| GUA(V) | 43 | 1.52 | GCA(A) | 57 | 1.09 | GAA(E) | 40 | 1.31 | GGA(G) | 35 | 0.98 |
| GUG(V) | 26 | 0.92 | GCG(A) | 14 | 0.27 | GAG(E) | 21 | 0.69 | GGG(G) | 46 | 1.29 |

**Supplementary Table S7**. The amino acid composition of 13 PCGs across different *Strix* species.

| **Amino acid** | ***Strix ocellata*** | ***Strix aluco*** | ***Strix leptogrammica*** | ***Strix occidentalis*** | ***Strix uralensis*** | ***Strix varia*** |
| --- | --- | --- | --- | --- | --- | --- |
| Ala | 130 | 210 | 185 | 182 | 201 | 209 |
| Arg | 280 | 189 | 198 | 182 | 197 | 199 |
| Asn | 212 | 180 | 181 | 192 | 178 | 186 |
| Asp | 34 | 59 | 49 | 57 | 57 | 52 |
| Cys | 75 | 61 | 69 | 55 | 57 | 53 |
| Gln | 103 | 111 | 137 | 114 | 108 | 110 |
| Glu | 37 | 61 | 63 | 63 | 59 | 61 |
| Gly | 123 | 143 | 139 | 134 | 147 | 143 |
| His | 255 | 185 | 218 | 197 | 191 | 192 |
| Ile | 293 | 254 | 239 | 279 | 258 | 265 |
| Leu | 536 | 523 | 484 | 528 | 538 | 531 |
| Lys | 102 | 98 | 95 | 100 | 101 | 95 |
| Met | 51 | 43 | 43 | 42 | 42 | 38 |
| Phe | 92 | 133 | 107 | 122 | 130 | 126 |
| Pro | 461 | 410 | 458 | 392 | 403 | 390 |
| Ser | 332 | 361 | 364 | 387 | 361 | 373 |
| Thr | 372 | 346 | 354 | 348 | 352 | 335 |
| Trp | 42 | 33 | 60 | 37 | 34 | 33 |
| Tyr | 119 | 151 | 147 | 151 | 143 | 163 |
| Val | 61 | 110 | 72 | 101 | 108 | 113 |
| Stp | 84 | 133 | 144 | 130 | 129 | 127 |

**Supplementary Table S7**. The mean inter- and intra-specific genetic divergences among 11 *Strix* species based on K2P distances estimated from partial mtCOI sequences.

| **Species Name** | **Inter-** | | | | | | | | | | **Intra-** |
| --- | --- | --- | --- | --- | --- | --- | --- | --- | --- | --- | --- |
| *Strix ocellata* |  |  |  |  |  |  |  |  |  |  | n/c |
| *Strix occidentalis* | 11.264 |  |  |  |  |  |  |  |  |  | 0.000 |
| *Strix woodfordii* | 14.517 | 12.292 |  |  |  |  |  |  |  |  | n/c |
| *Strix rufipes* | 14.770 | 4.226 | 12.536 |  |  |  |  |  |  |  | 0.004 |
| *Strix hylophila* | 15.365 | 4.701 | 13.118 | 2.180 |  |  |  |  |  |  | n/c |
| *Strix virgata* | 15.796 | 7.977 | 12.719 | 5.282 | 3.667 |  |  |  |  |  | 0.033 |
| *Strix varia* | 16.045 | 8.666 | 12.113 | 6.527 | 7.275 | 8.900 |  |  |  |  | 0.063 |
| *Strix davidi* | 17.104 | 11.479 | 6.130 | 11.721 | 13.959 | 15.263 | 14.363 |  |  |  | n/c |
| *Strix aluco* | 17.121 | 11.407 | 5.955 | 10.194 | 12.358 | 13.339 | 12.885 | 3.146 |  |  | 0.014 |
| *Strix uralensis* | 17.533 | 11.911 | 5.552 | 10.968 | 13.169 | 14.452 | 13.719 | 0.776 | 3.886 |  | 0.008 |
| *Strix leptogrammica* | 19.793 | 15.599 | 10.974 | 15.398 | 16.012 | 17.361 | 16.624 | 9.432 | 8.359 | 10.336 | 0.053 |

**Supplementary Table S8**. The mean inter- and intra-specific genetic divergences among 12 *Strix* species based on K2P distances estimated from partial mtCytb sequences.

| **Species Name** | **Inter-** | | | | | | | | | | | **Intra-** |
| --- | --- | --- | --- | --- | --- | --- | --- | --- | --- | --- | --- | --- |
| *Strix ocellata* |  |  |  |  |  |  |  |  |  |  |  | n/c |
| *Strix virgata* | 10.028 |  |  |  |  |  |  |  |  |  |  | 0.000 |
| *Strix omanensis* | 12.370 | 11.610 |  |  |  |  |  |  |  |  |  | 0.010 |
| *Strix rufipes* | 12.496 | 4.844 | 14.155 |  |  |  |  |  |  |  |  | 0.000 |
| *Strix occidentalis* | 13.142 | 8.355 | 13.826 | 10.784 |  |  |  |  |  |  |  | 0.000 |
| *Strix butleri* | 13.488 | 8.094 | 9.658 | 11.735 | 11.105 |  |  |  |  |  |  | 0.008 |
| *Strix aluco* | 13.744 | 14.053 | 11.928 | 13.981 | 12.007 | 13.402 |  |  |  |  |  | 0.000 |
| *Strix hadorami* | 13.656 | 8.247 | 9.514 | 11.904 | 11.271 | 0.391 | 13.252 |  |  |  |  | n/c |
| *Strix uralensis* | 14.089 | 11.113 | 11.663 | 11.064 | 14.317 | 12.611 | 11.160 | 12.462 |  |  |  | 0.004 |
| *Strix woodfordii* | 14.299 | 9.447 | 13.380 | 14.507 | 11.896 | 8.990 | 12.430 | 8.991 | 13.901 |  |  | 0.011 |
| *Strix varia* | 15.390 | 7.135 | 14.858 | 8.476 | 10.763 | 12.421 | 13.901 | 12.351 | 11.976 | 15.014 |  | 0.055 |
| *Strix leptogrammica* | 17.054 | 12.656 | 17.718 | 17.364 | 13.252 | 12.163 | 16.036 | 12.334 | 16.166 | 18.521 | 16.857 | 0.007 |
